# Supplementary figures and images for: Digital next-generation sequencing identifies low-abundance mutations in pancreatic juice samples collected from the duodenum of patients with pancreatic cancer and intraductal papillary mucinous neoplasms
Source: PubMed Central journal article supplement — Gut. 2016 Jul 18;66(9):1677–87. doi: 10.1136/gutjnl-2015-311166 (PMC5243915; doi:10.1136/gutjnl-2015-311166), 2016-07-18

Supplementary Figures

Supplementary Figure 1:

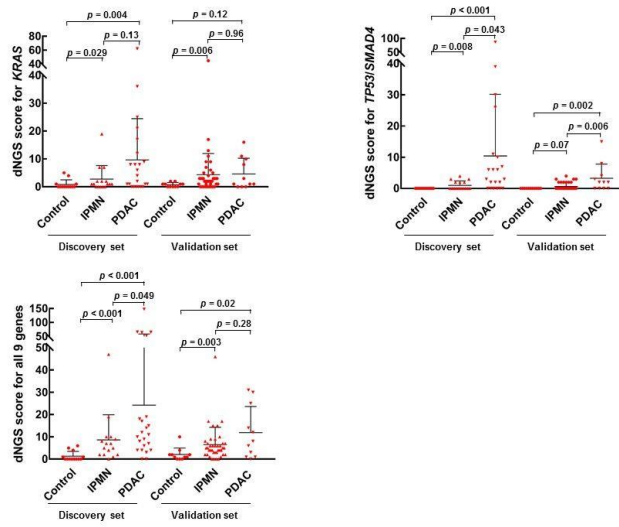

Supplementary Figure 2:

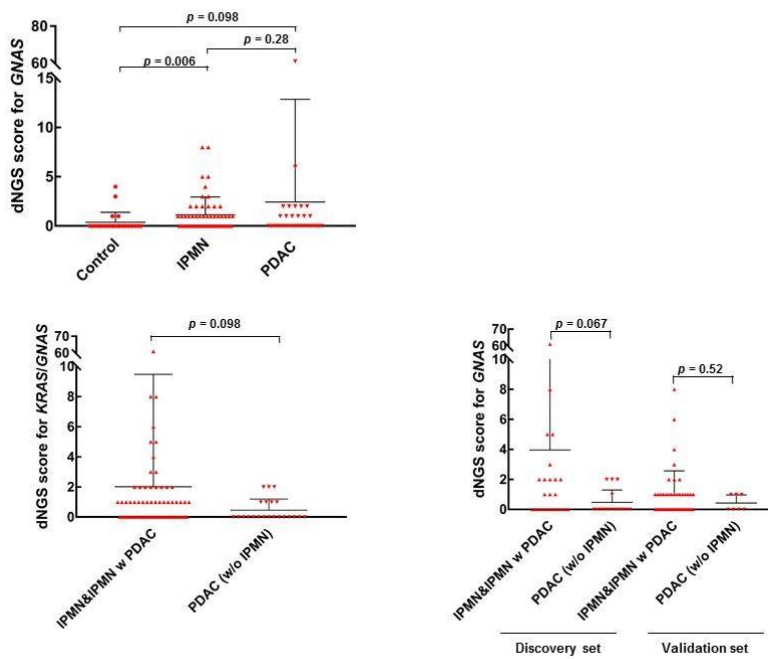

Supplementary Figure 3:

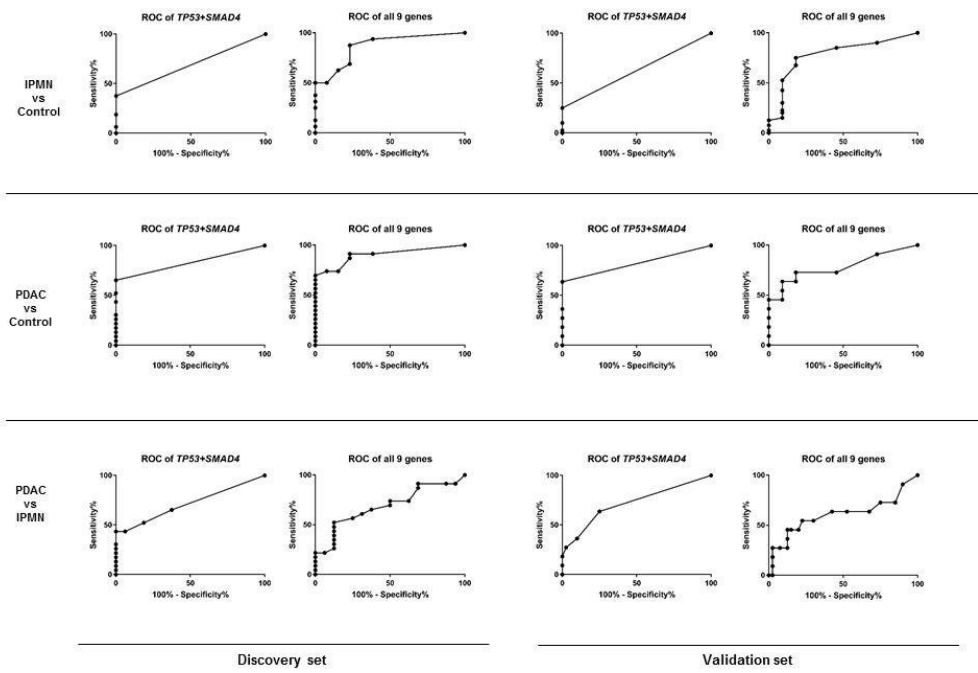

Supplement: NIHMS813323-supplement-s3.pdf [file NIHMS813323-supplement-s3.pdf]
